# Supplementary material for: Metabolic Engineering of Extremophilic Bacterium Deinococcus radiodurans for the Production of the Novel Carotenoid Deinoxanthin
Source: PubMed Central journal article supplement (PMC7823818; doi:10.3390/microorganisms9010044), 2020-12-25
Supplement: microorganisms-09-00044-s001.pdf [file microorganisms-09-00044-s001.pdf]

**Table S1.** Primers used in this study

| Primer     | Sequence (5' to 3') <sup>1</sup>               | Restriction enzyme |
|------------|------------------------------------------------|--------------------|
| drc06-1    | ttacctactgtgccaagca                            |                    |
| drc06-2    | atgcgcaaatcagaccgtgcaggccttgacgacagccacgcactct | <i>StuI</i>        |
| drc07-3    | agagtgcgtggctgtcgtcaaggcctgcacggtctgattgcat    | <i>StuI</i>        |
| drc07-4    | gatgagacattcctgtgta                            |                    |
| groE-F1    | ctatggtagctcggttgaagcacgtatt                   | <i>KpnI</i>        |
| groE-F2    | ctataggccttcggttgaagcacgtatt                   | <i>StuI</i>        |
| crtB-R1    | ctatgatatctcagccgtggaccgcgccca                 | <i>EcoRV</i>       |
| crtB-R2    | taacaggccttacggttcgtataatgatg                  | <i>StuI</i>        |
| diadrc06-F | aatgggtatactcagaacg                            |                    |
| diadrc06-R | caggcaattactgctccaag                           |                    |
| drc04-1    | cgtaggtaccgtgtggtaccacgccgata                  | <i>KpnI</i>        |
| drc04-2    | ccatctcgagctcgtgcagcgcgaatcaggttcgtgcgaa       | <i>XhoI, PstI</i>  |
| drc05-1    | ccatggatccactctacgtcaggccattt                  | <i>BamHI</i>       |
| drc05-2    | ctcggcatgctgcttggcacagtgggtaa                  | <i>SphI</i>        |
| dxs-F1     | ctcgtgcagtcggcttgaagcacgtatt                   | <i>PstI</i>        |
| dxs-R1     | ctcggatatctacacctcaatcggcacgt                  | <i>EcoRV</i>       |
| diadrc04-F | tccgaagtagacgtcgcac                            |                    |
| diadrc04-R | agcgaggtagaacgaatcgt                           |                    |

<sup>1</sup> Restriction enzyme site is underlined in the sequence

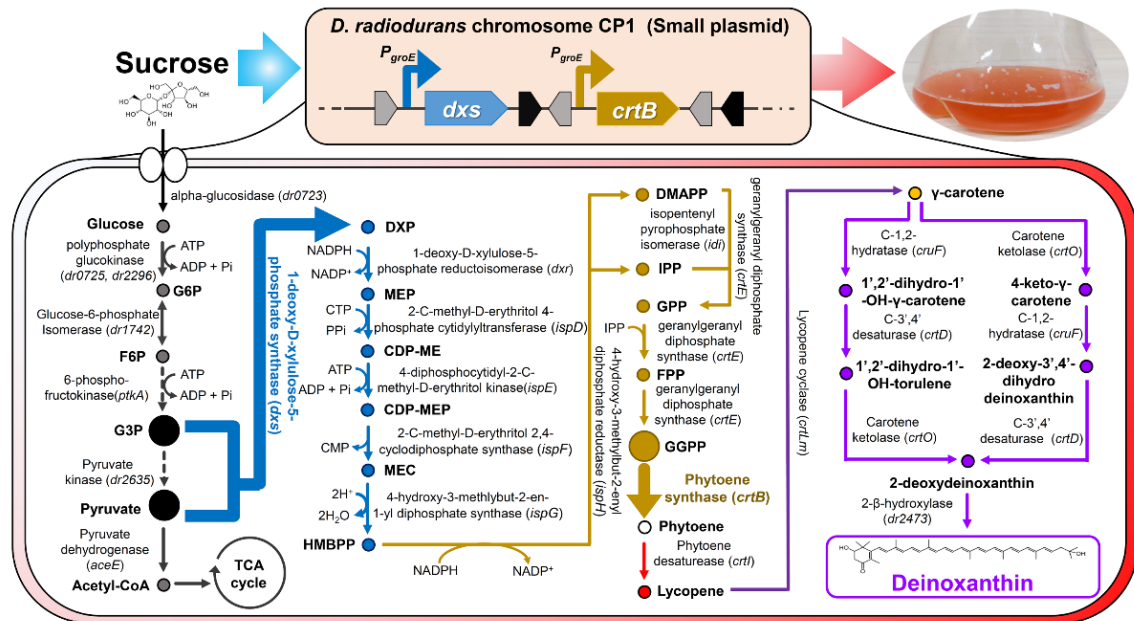

**Figure S1.** Schematic illustration of the deinoxanthin biosynthetic pathway and the metabolic engineering approach to enhancing deinoxanthin production in *D. radiodurans*. The thick arrows and large circles indicate the increased flux arising from *dxs* and *crtB* overexpression and rate-limiting steps in carotenoid production in *D. radiodurans*. The dashed lines indicate multiple steps in the corresponding metabolic pathway. Intermediate precursors in the metabolic pathway: G6P, glucose 6-phosphate; F6P, fructose 6-phosphate; G3P, glyceraldehyde 3-phosphate; DXP, 1-deoxy-D-xylulose 5-phosphate; MEP,

2-C-methyl-D-erythritol 4-phosphate; CDP-ME, 4-(cytidine 5'-diphospho)-2-C-methyl-D-erythritol; CDP-MEP, 2-phospho-4-(cytidine 5'-diphospho)-2-C-methyl-D-erythritol; MEC, 2-C-methyl-D-erythritol 2,4-cyclodiphosphate; HMBPP, (E)-4-hydroxy-3-methylbut-2-en-1-yl diphosphate; DMAPP, dimethylallyl diphosphate; IPP, isopentenyl diphosphate; GPP, geranyl diphosphate; FPP, farnesyl diphosphate; GGPP, geranylgeranyl diphosphate.
